# Supplementary material for: Cytotoxic properties of a new organometallic platinum(ii) complex and its gold(i) heterobimetallic derivatives
Source: Royal Society of Chemistry journal article supplement (doi:10.1039/c5dt02714d), 2015-11-13
Supplement: c5dt02714d1.pdf [file c5dt02714d1.pdf]

## SUPPLEMENTARY INFORMATION AVAILABLE

### Cytotoxic Properties of a New Organometallic Platinum(II) Complex and its Gold(I) Heterobimetallic Derivatives

Maria Serratrice, Laura Maiore, Antonio Zucca, Sergio Stoccoro, Ida Landini, Enrico Mini, Lara Massai, Giarita Ferraro, Antonello Merlino, Luigi Messori and Maria Agostina Cinellu

**Table S1.** Absorption characteristics of compounds **2** – **5-Cl** in various solvents. <sup>a</sup>negative deviation from Lambert-beer law.

| Compound                | $\lambda_{\max}$ , nm ( $\epsilon$ , Lmol <sup>-1</sup> cm <sup>-1</sup> ) |                                                                              |                                                       |                    |
|-------------------------|----------------------------------------------------------------------------|------------------------------------------------------------------------------|-------------------------------------------------------|--------------------|
|                         | CH <sub>2</sub> Cl <sub>2</sub>                                            | CH <sub>3</sub> CN                                                           | DMSO                                                  | BP 10 mM<br>pH 7.4 |
| pbiH                    | 310                                                                        | 308 (74405)                                                                  | 313                                                   | 227, 307           |
| <b>2</b>                | -                                                                          | -                                                                            | 291 (9779)<br>328 sh (11598)<br>344 (13158)           | -                  |
| <b>3</b>                | 240 sh (7935)<br>293 (3463)<br>346 (5565)                                  | 207 sh (9120)<br>237 sh (6034)<br>293 (2730)<br>341 (4258)                   | 297 (2201)<br>345 (3990)                              | 338                |
| <b>4-PF<sub>6</sub></b> | 238 (23033)<br>267 (9586)<br>275 (8905)<br>337 (15403)                     | 215 (2168)<br>235 ( <sup>a</sup> )<br>267 (5998)<br>275 (5775)<br>329 (9804) | 261 (8476)<br>268 (9858)<br>276 (9159)<br>342 (14060) | 234 (-)<br>338 (-) |
| <b>5-Cl</b>             | 235 (22606)<br>294 sh (9142)<br>342 (15190)                                | 208 ( <sup>a</sup> )<br>239 sh (20808)<br>335 (13478)                        | 264 (8580)<br>296 (8890)<br>345 (14286)               | 232 (-)<br>338 (-) |

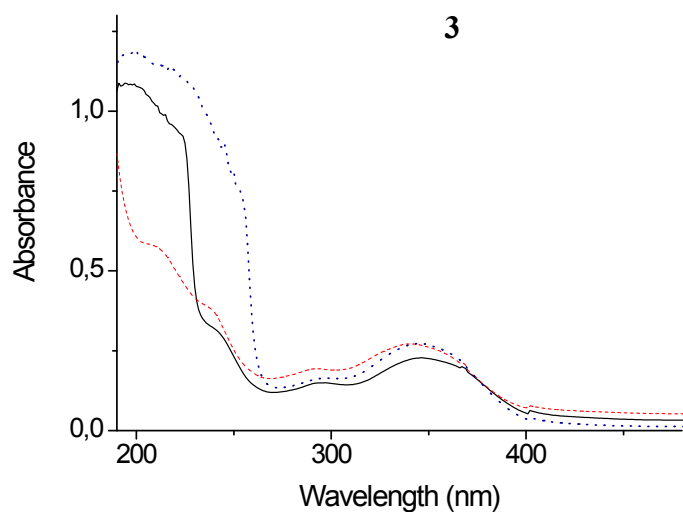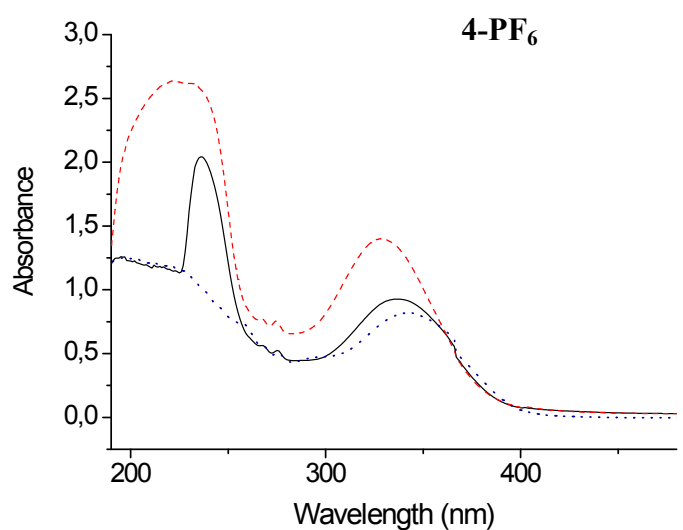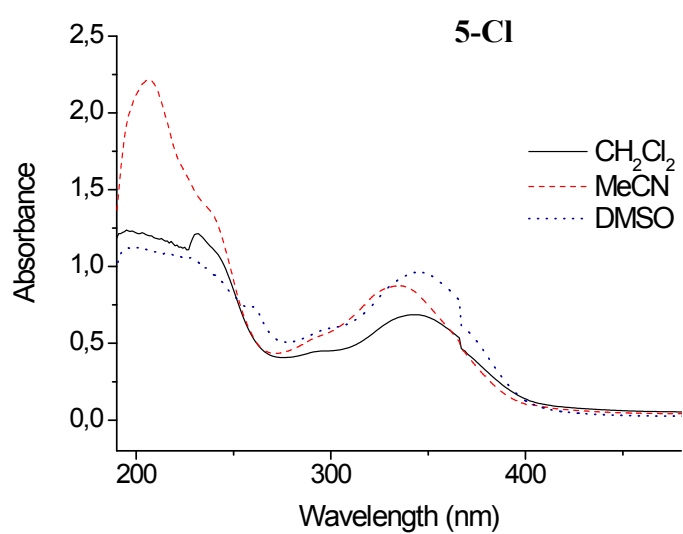

**Figure S1.** UV-Vis spectra of compounds **3** – **5-Cl** in CH<sub>2</sub>Cl<sub>2</sub>, MeCN and DMSO solutions at  $6 \cdot 10^{-5}$  mol/L.

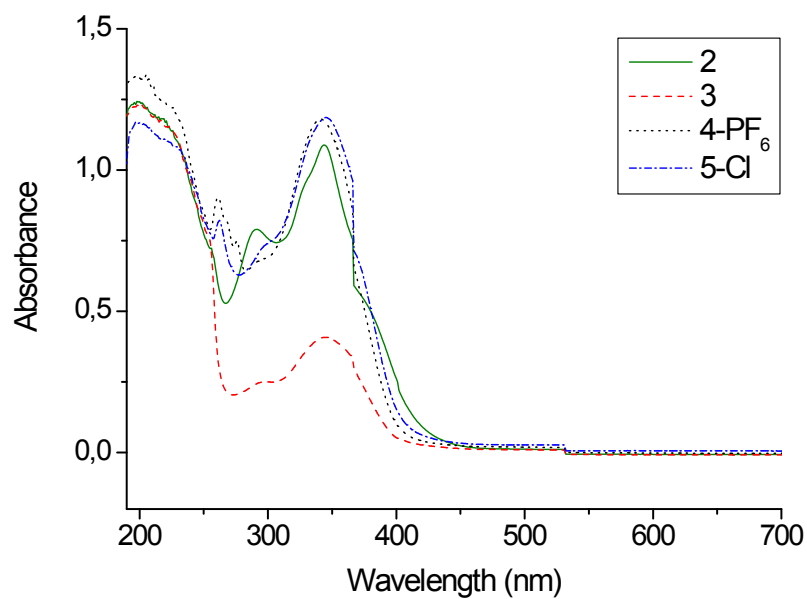

**Figure S2.** UV-Vis spectra of compounds **2**, **3**, **4-PF<sub>6</sub>** and **5-Cl** in DMSO solution at  $6 \cdot 10^{-5}$  mol/L.

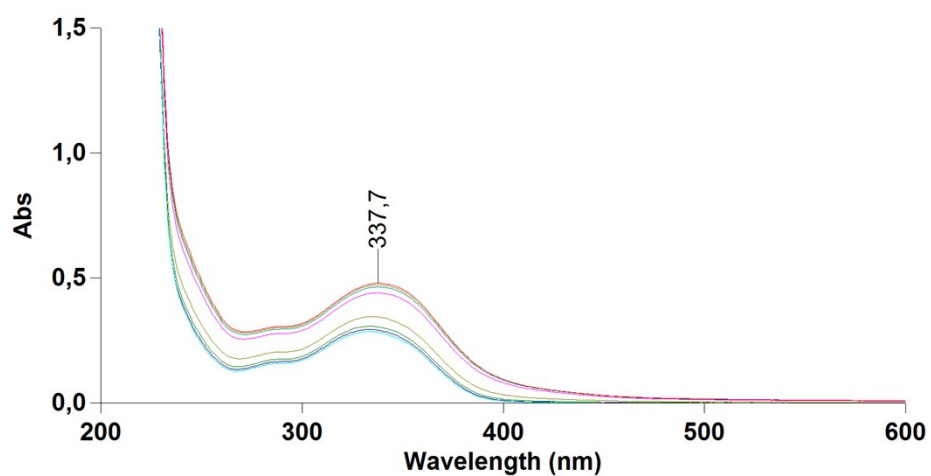

**Figure S3.** UV-Vis absorption spectral profiles of compounds **3** in 30  $\mu$ M phosphate buffered solution, 10 mM, pH 7.4. Spectra were recorded at different times over 24 hours at room temperature.

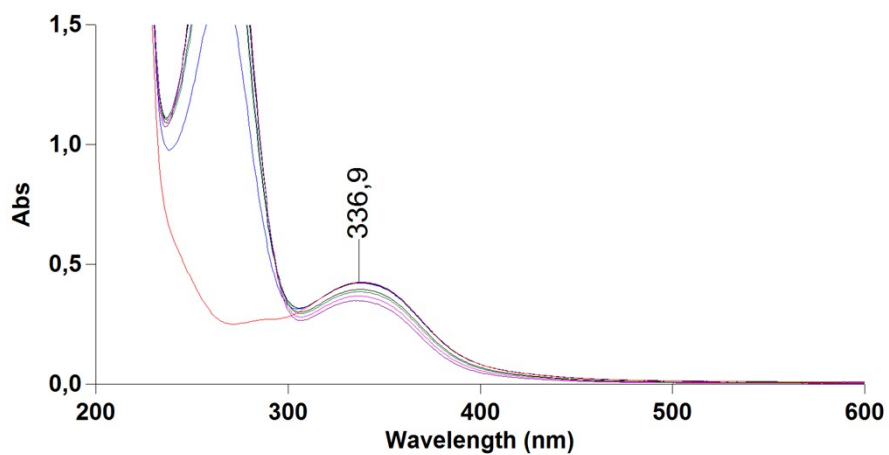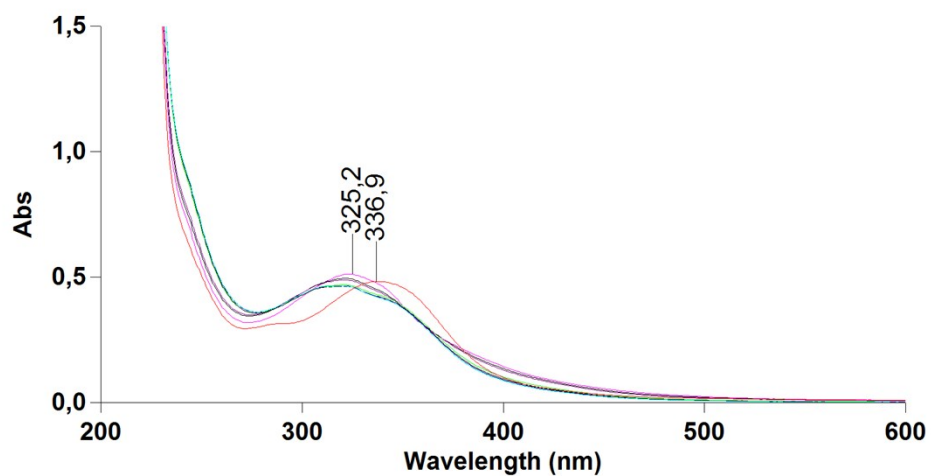

**Figure S4.** UV-Vis absorption spectral profiles of compounds **3** in  $3 \times 10^{-5}$  M phosphate buffered solution (10 mM, pH 7.4) before and after addition of Asc.Ac. (up) and GSH (down). Spectra were recorded at different times over 12 hours at room temperature.

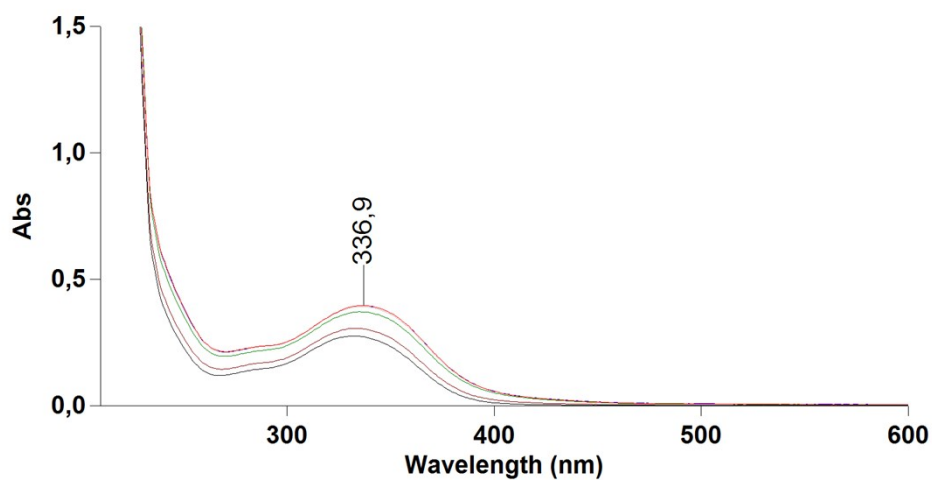

A

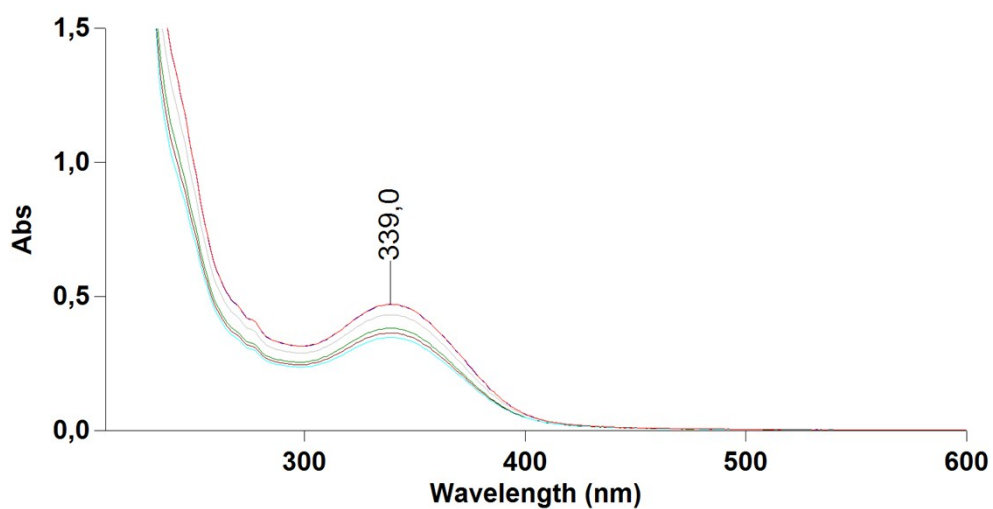

B

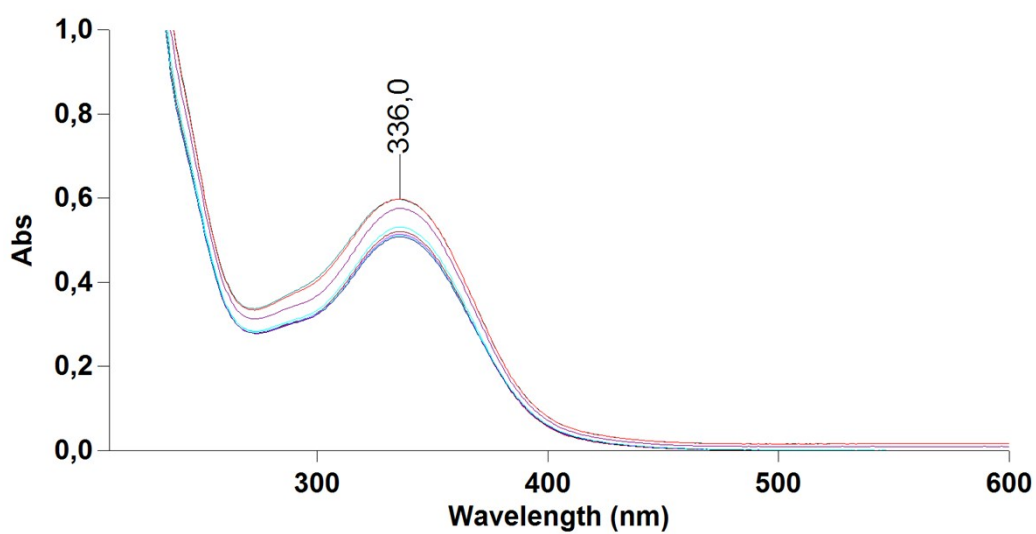

C

**Figure S5.** UV-Vis absorption spectral profiles of compounds 3 (A) 4-PF<sub>6</sub> (B) and 5-Cl (C) in Ammonium Acetate solution (20 mM, pH 6.8). Spectra were recorded at different times over 24 hours at room temperature.

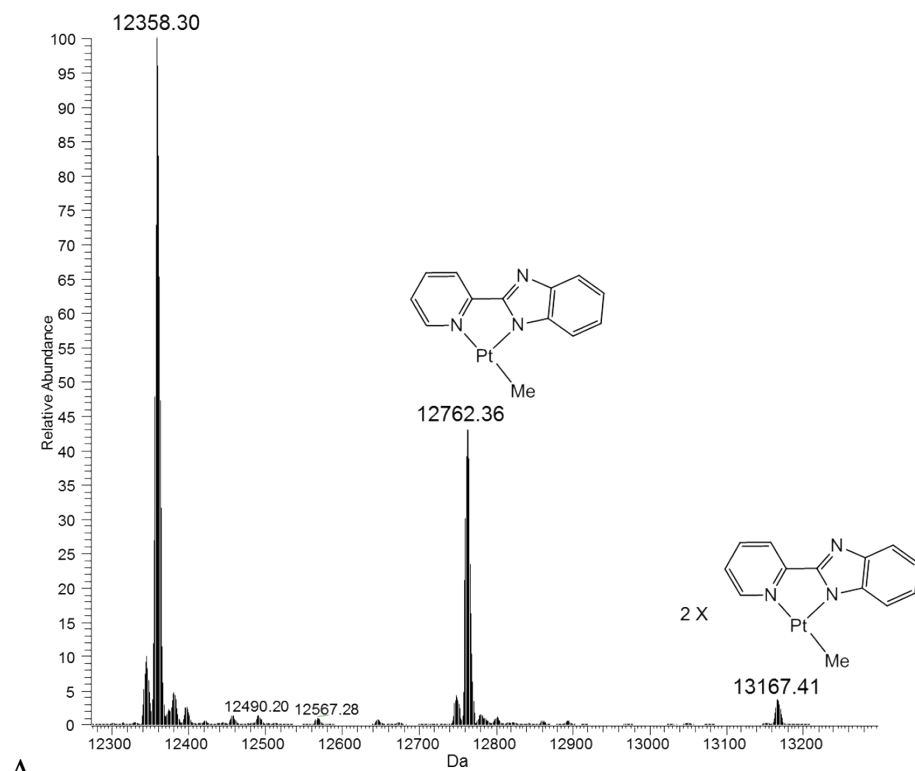

A

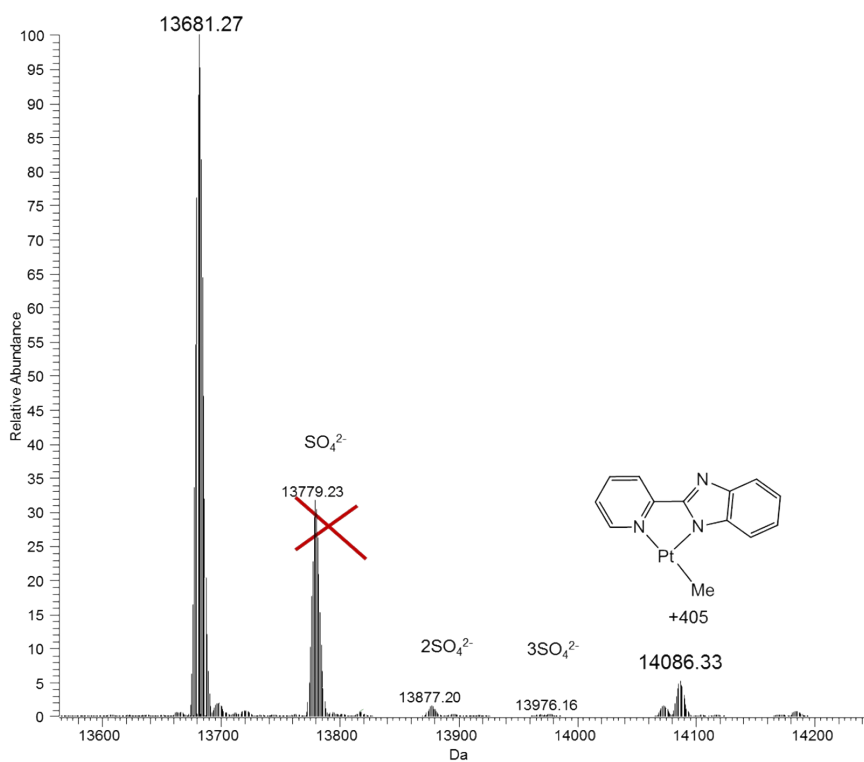

B

**Figure S6** LTQ-Orbitrap ESI mass spectra of compound 3 in the presence of cytochrome c (A) and RNase (B) with a metallodrug-protein molar ratio of 3:1.

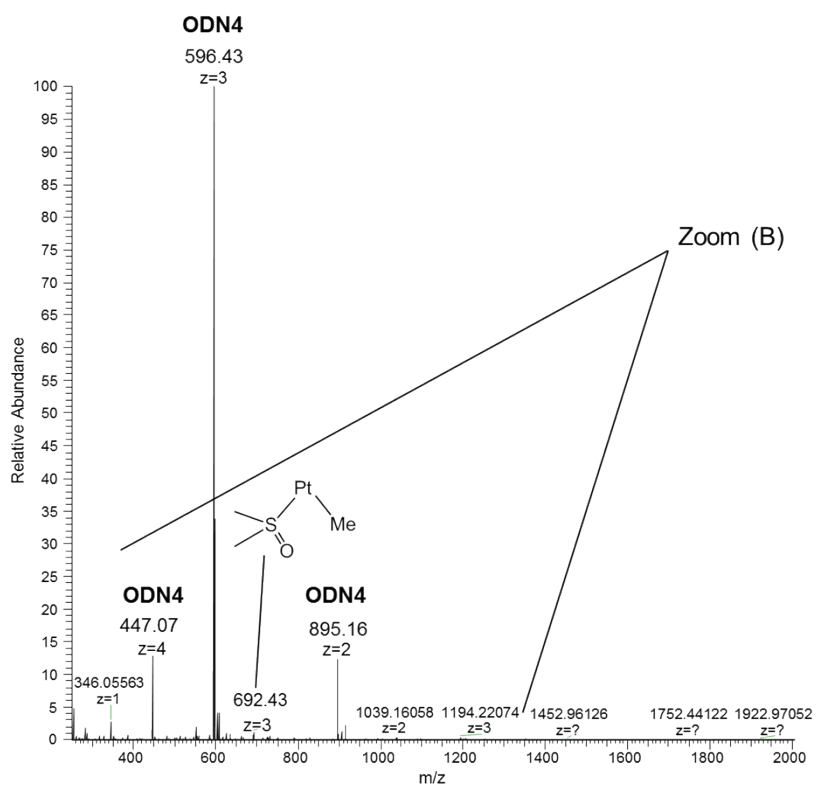

A

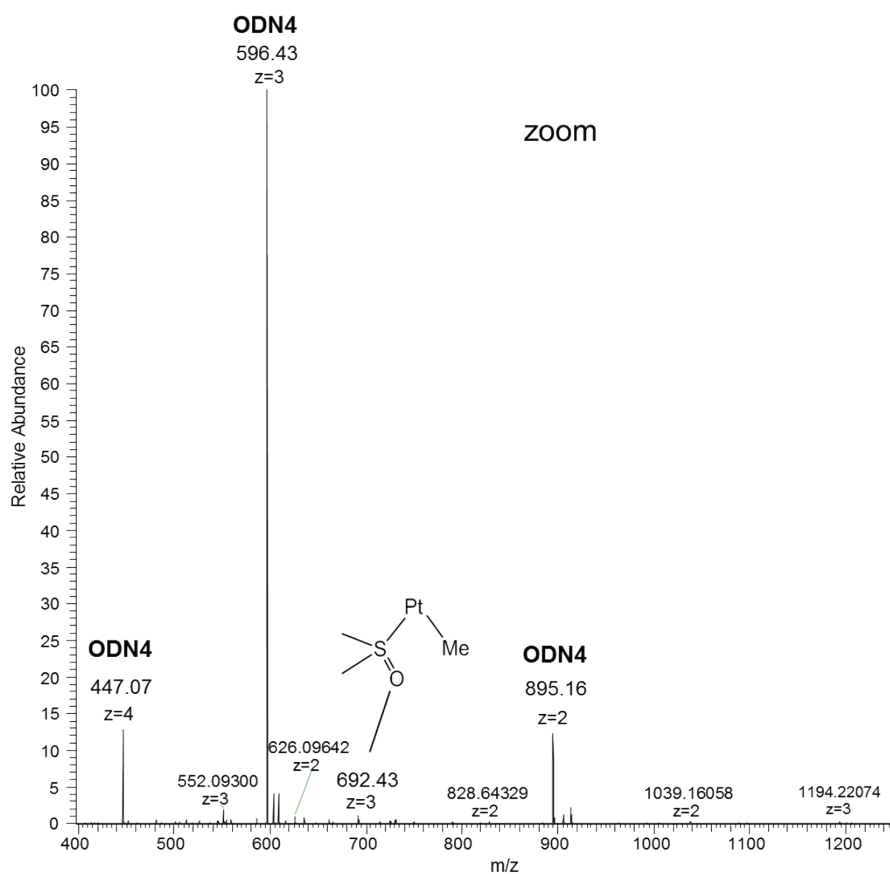

B

**Figure S7** LTQ-Orbitrap ESI mass spectra of compound 3 in the presence of ODN4 with a metallodrug-oligonucleotide molar ratio of 3:1.

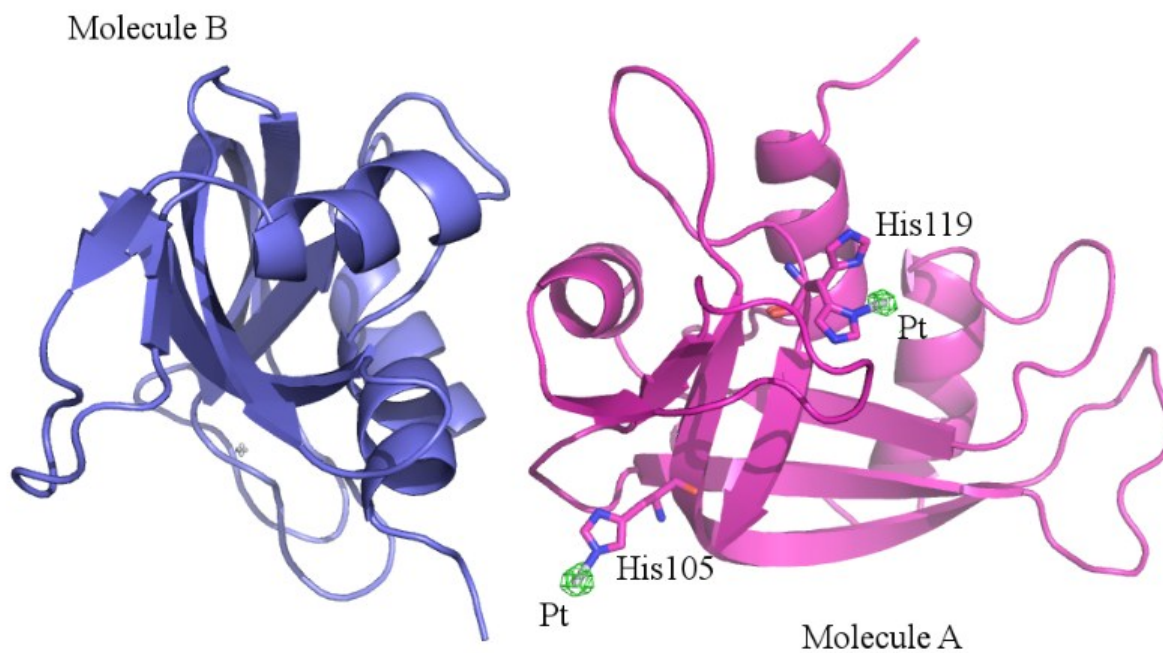

**Figure S8.** Overall content of the asymmetric unit of RNase A/3. The two RNase A chains denoted as molecule A and molecule B are coloured in pink and violet, respectively. Pt binding occurs only in molecule A. Anomalous electron density map is coloured in green and contoured at  $3.0\sigma$  level.



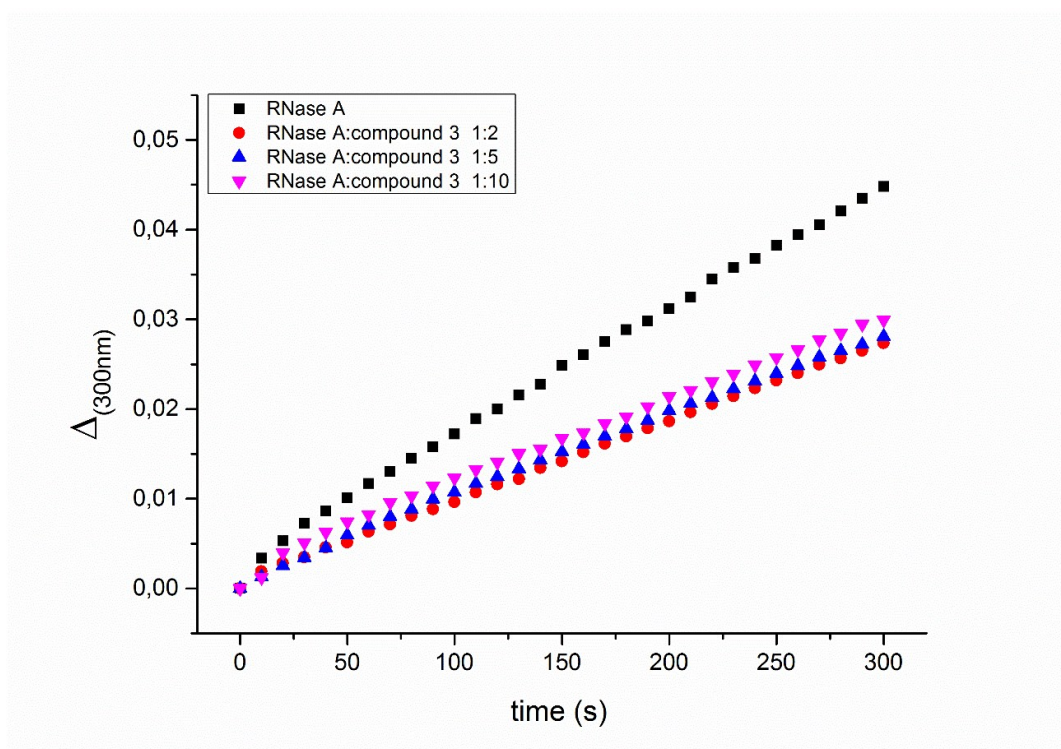

A

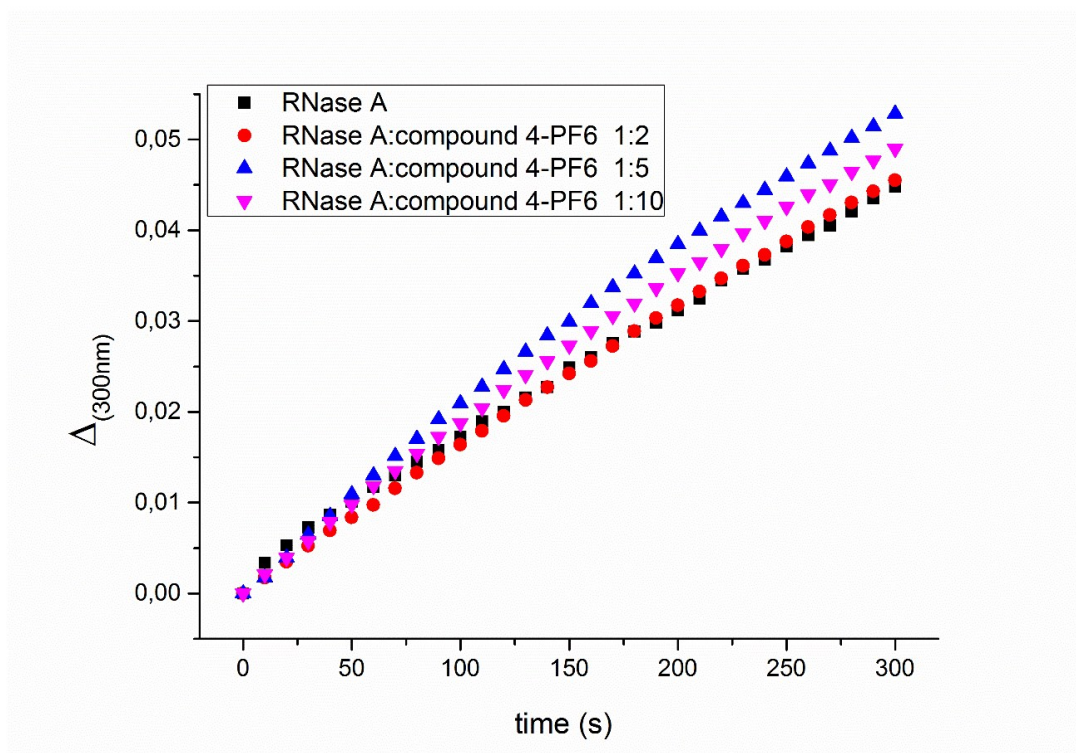

B

**Figure S9.** Hydrolysis of yeast RNA by RNase A free and in complex with 3 (panel A) and 4-PF<sub>6</sub> (panel B) in different protein:metal compound ratios. Experiments have been performed using the

**Table S2.** Data collection and refinement statistics

Kunitz method in 50 mM sodium acetate pH 5.0 (see SI for details). The values are the average of three independent experiments.

|                                                  | RNase A/ <b>3</b>      | RNase A/ <b>4-PF<sub>6</sub></b> |
|--------------------------------------------------|------------------------|----------------------------------|
| <b>Data collection</b>                           |                        |                                  |
| Space group                                      | C2                     | C2                               |
| Unit cell parameter                              |                        |                                  |
| a/b/c (Å), $\beta$ (°)                           | 100.4/32.7/72.5, 89.9° | 99.5/31.2/69.0 Å, 90.7°          |
| Observed reflections                             | 55531                  | 56875                            |
| Unique reflections                               | 16494                  | 23228                            |
| Resolution (Å)                                   | 72.5-1.98 (2.01-1.98)  | 69.0-1.68 (1.71-1.68)            |
| Completeness (%)                                 | 98.8 (100.0)           | 95.0 (88.4)                      |
| Rmerge                                           | 0.087 (0.408)          | 0.097 (0.296)                    |
| I/ $\sigma$ (I)                                  | 4.8 (2.6)              | 6.5 (2.0)                        |
| Multiplicity                                     | 3.4 (3.2)              | 2.4 (1.6)                        |
| <b>Refinement</b>                                |                        |                                  |
| Resolution (Å)                                   | 72.5-1.98              | 69.0-1.68                        |
| number of reflections in working set             | 15652                  | 22040                            |
| number of reflections in test set                | 834                    | 1188                             |
| R factor/R <sub>free</sub> /R <sub>all</sub> (%) | 0.195/0.254/0.192      | 0.183/0.234/0.186                |
| Number of non-hydrogen atoms                     | 2111                   | 2118                             |
| Mean Overall B-value(Å <sup>2</sup> )            | 34.3                   | 30.2                             |
| R.m.s.d. bonds (Å)                               | 0.019                  | 0.019                            |
| R.m.s.d. angles (°)                              | 1.92                   | 1.92                             |
| Estimated overall coordinate error               |                        |                                  |
| based on R value/R free/maximum likelihood (Å)   | 0.211/0.189/0.155      | 0.126/0.126/0.102                |
